# Supplementary material for: Decursin inhibits tumor progression in head and neck squamous cell carcinoma by downregulating CXCR7 expression in vitro
Source: PubMed Central journal article supplement — Oncol Rep. 2021 Dec 24;47(2):39. doi: 10.3892/or.2021.8250 (PMC8759107; doi:10.3892/or.2021.8250), 2021-12-24
Supplement: Supplementary_Data.pdf [file Supplementary_Data.pdf]

Figure S1. (A) Immunofluorescence staining of CXCR7 in SNU1041-CXCR7 and SNU1076-CXCR7 HNSCC cells. Scale bar, 100  $\mu$ m. (B) Transwell migration (upper panel) and invasion (lower panel) assays showing that SDF-1 $\alpha$  promoted cell migration and invasion in CXCR7-overexpressed HNSCC cells. Three independent experiments were carried out in triplicate. \*\*\*P<0.001. HNSCC, head and neck squamous cell carcinoma; CXCR7, CXC chemokine receptor type 7; SDF-1 $\alpha$ , stromal cell-derived factor-1 $\alpha$ .

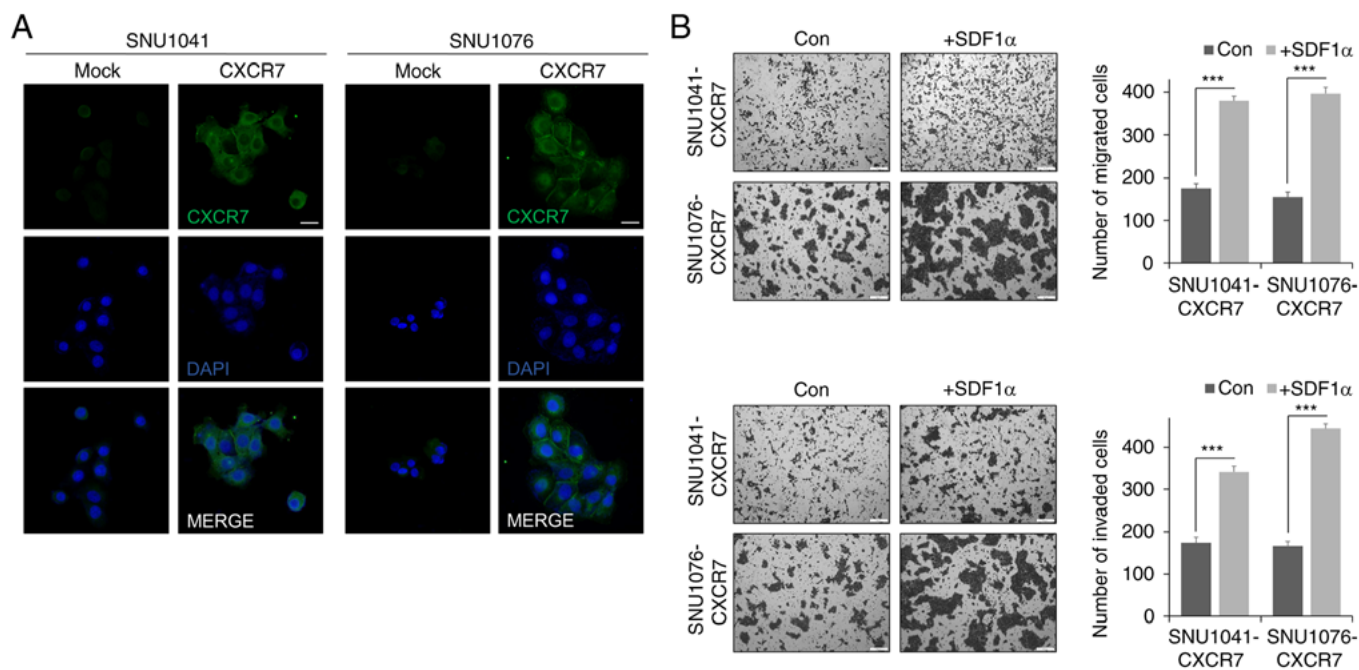

Figure S2. Decursin suppresses cell growth in a dose-dependent manner. Three independent experiments were carried out in triplicate. Magnification, x100. \*\*P<0.01 and \*\*\*P<0.001.

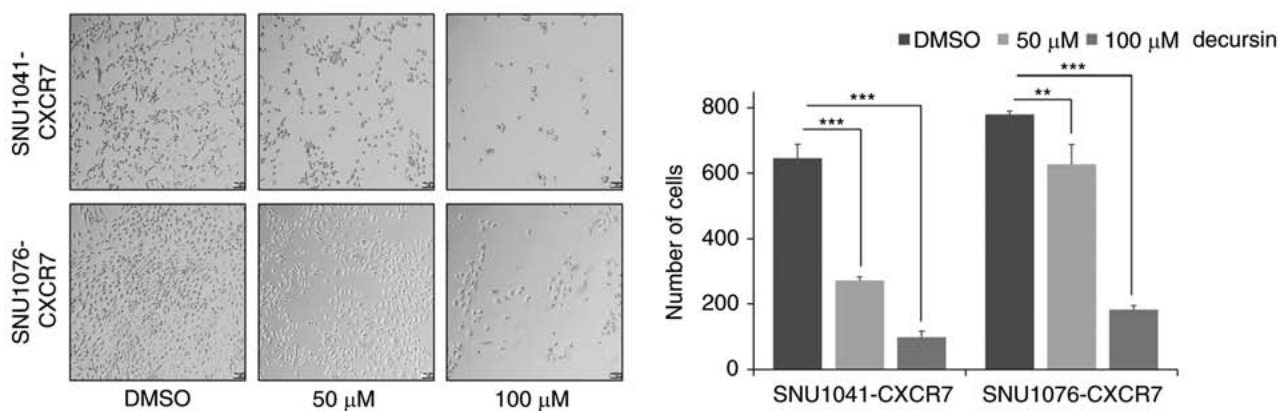

Figure S3. (A) Immunofluorescence staining of cyclin A in SNU1041-CXCR7 and SNU1076-CXCR7 HNSCC cells treated with 100  $\mu$ M decursin. Scale bar, 100  $\mu$ m. (B) Flow cytometry analysis showing CXCR7 expression using siRNA in CXCR7-overexpressing cells. (C) Transwell migration (upper panel) and invasion (lower panel) assays showing that knockdown of CXCR7 inhibited cell migration and invasion in CXCR7-overexpressing cells. Three independent experiments were carried out in triplicate. \*\* $P < 0.01$  and \*\*\* $P < 0.001$ . HNSCC, head and neck squamous cell carcinoma; CXCR7, CXC chemokine receptor type 7.

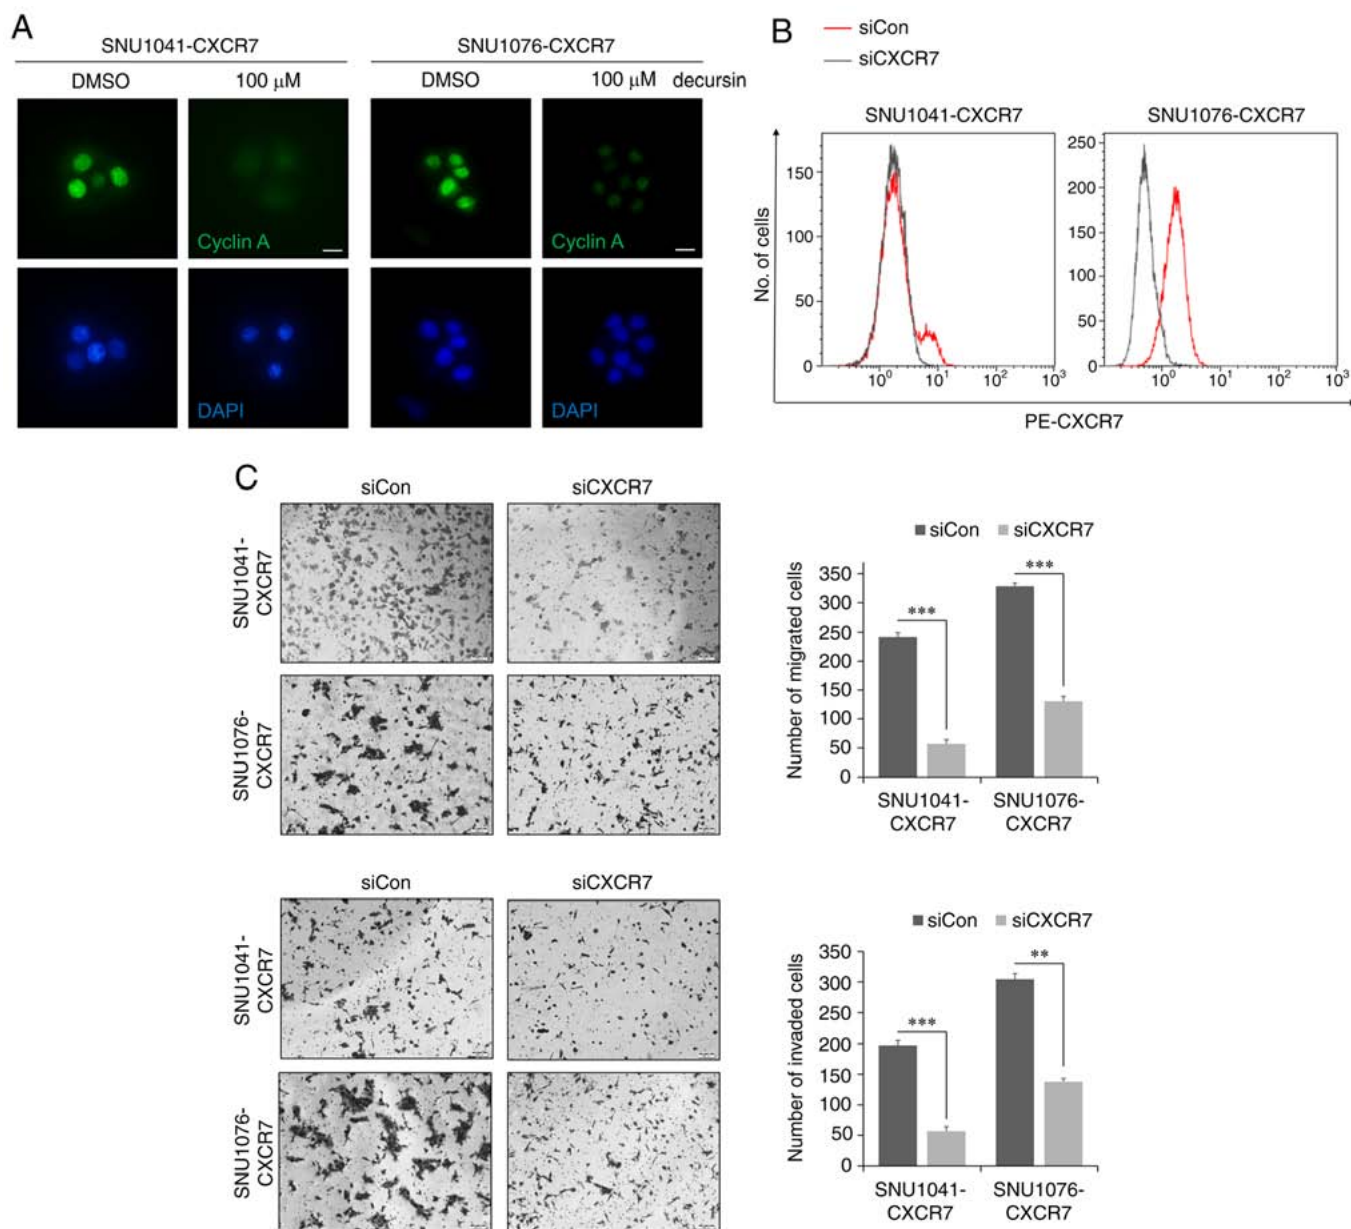

Figure S4. (A) Western blot analysis of components of several cancer-related pathways. Primary antibodies used for the western blot analysis are listed in Table SII. Histograms of the protein expression levels are presented in Fig. S5I. (B) Upregulation of CXCR7 and STAT3 in HNSCC and (C) the correlation of CXCR7 and STAT3 expression in the GEPIA dataset. \* $P < 0.05$ . HNSCC, head and neck squamous cell carcinoma; CXCR7, CXC chemokine receptor type 7; STAT3, signal transducer and activator of transcription 3.

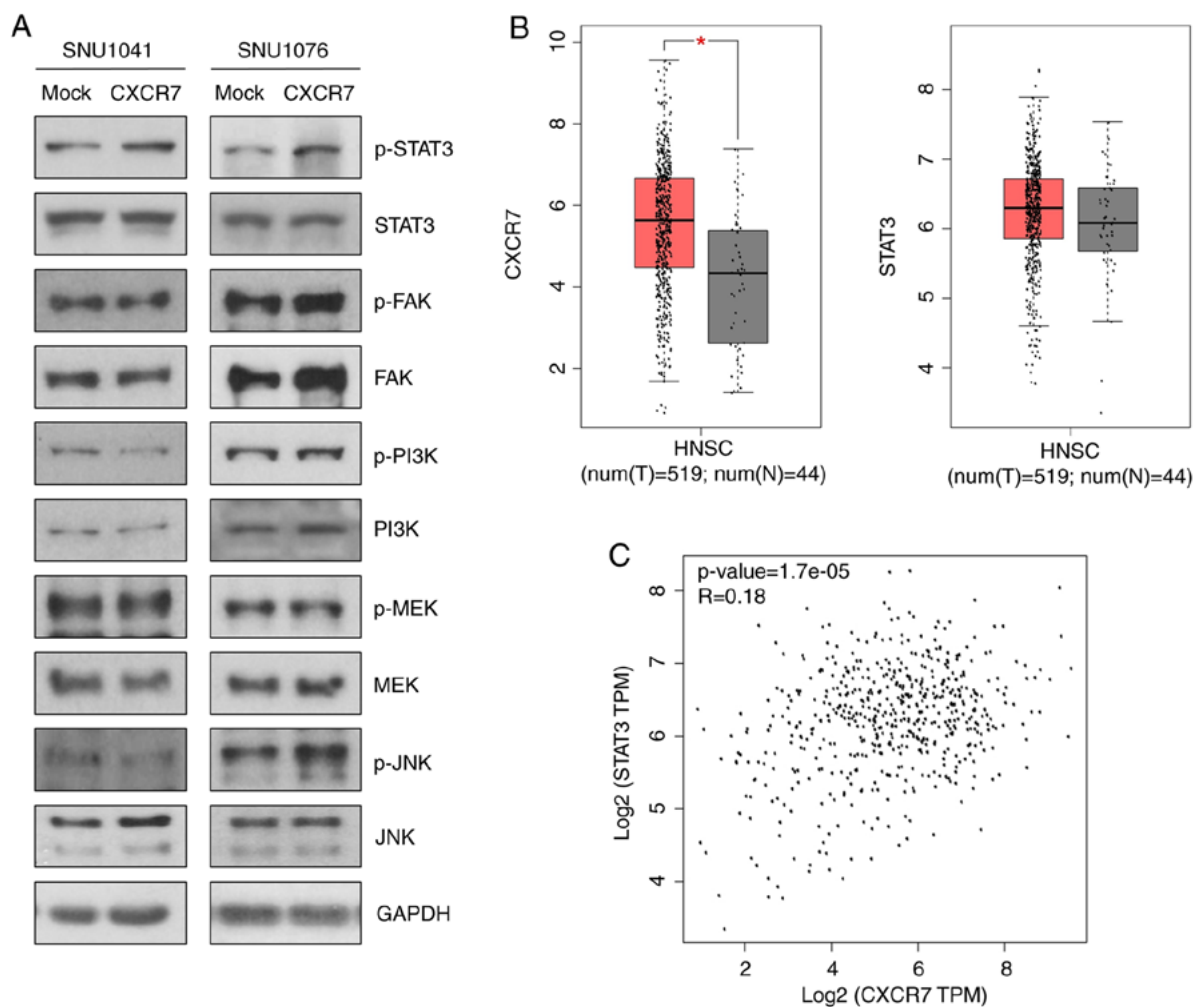

Figure S5. Continued.

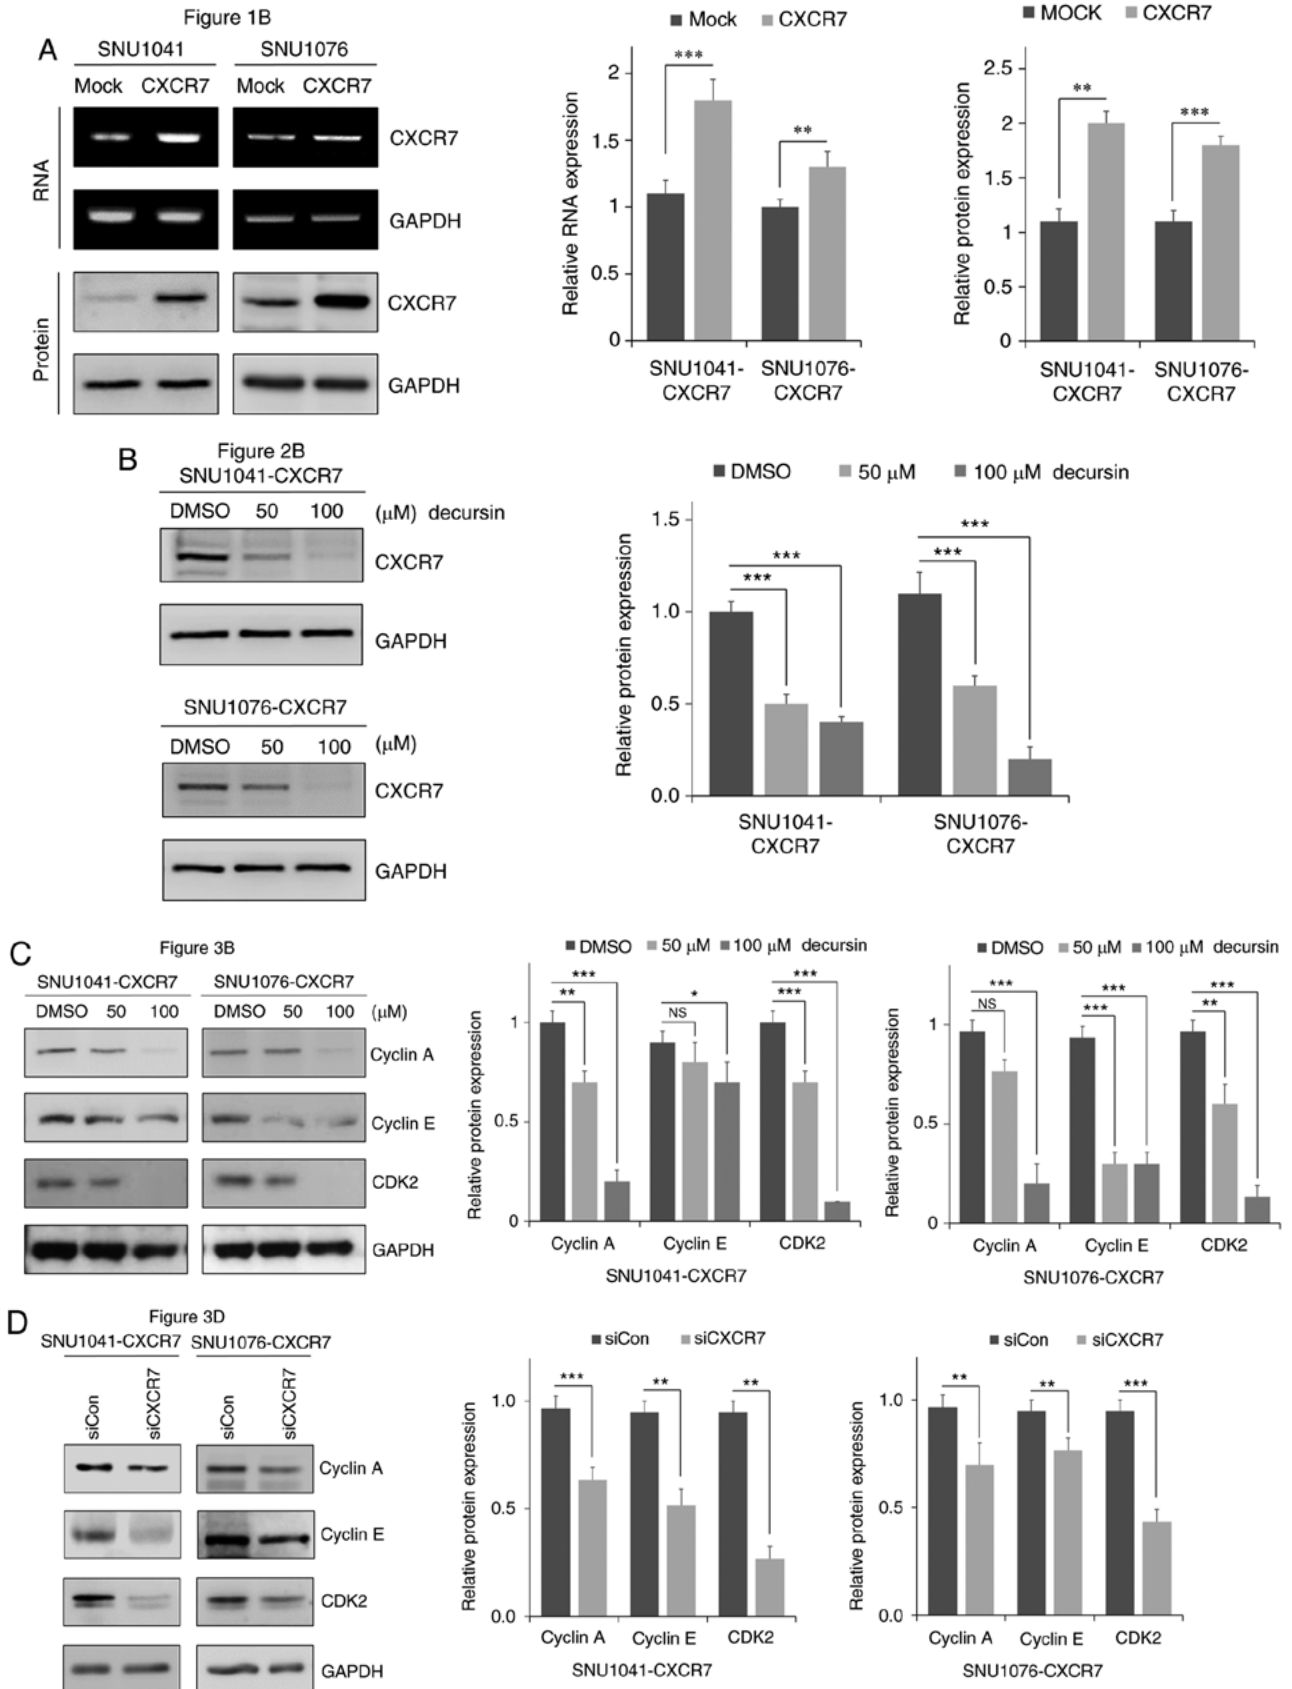

Figure S5. Continued.

E

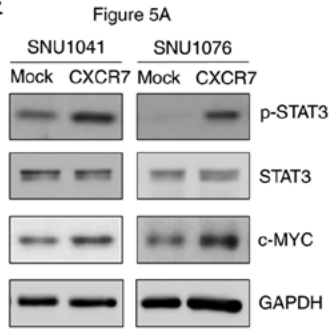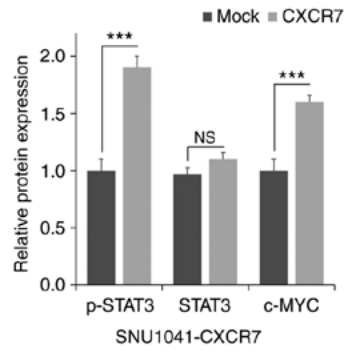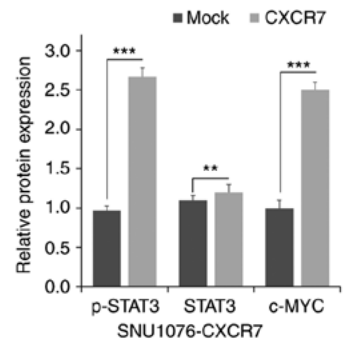

F

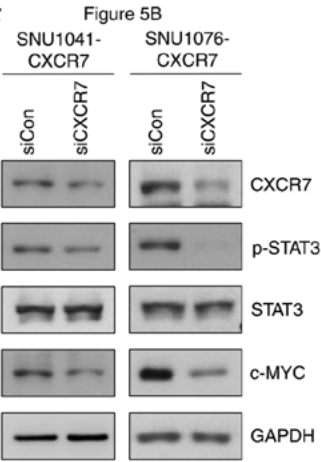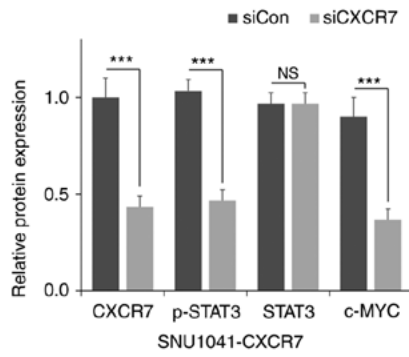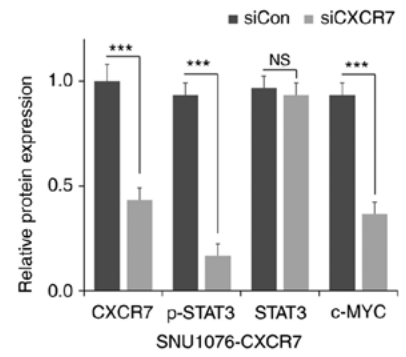

G

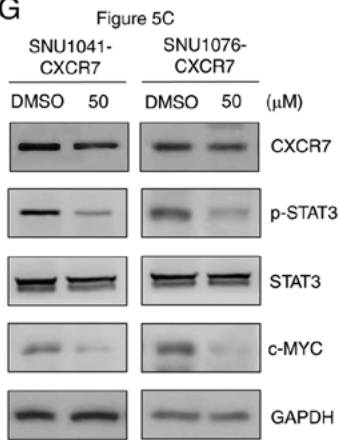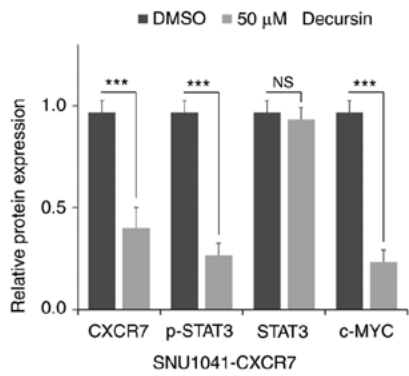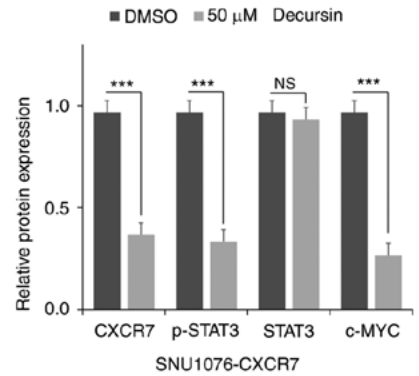

Figure S5. (A-I) Histograms showing the density ratio of the expression. Data in all graphs represent the mean of values measured by densitometry from three separate blots. NS, not significant. \*P<0.05, \*\*P<0.01, and \*\*\*P<0.001.

H

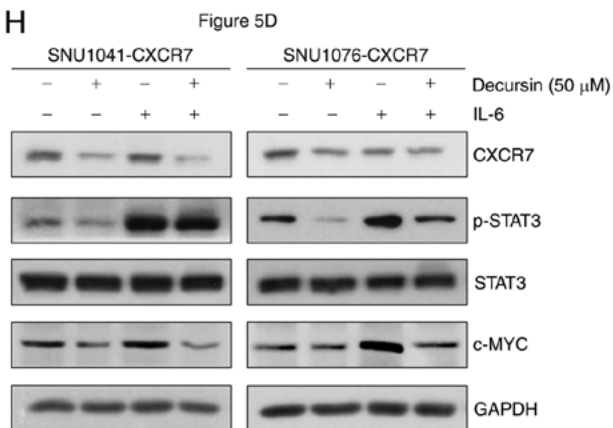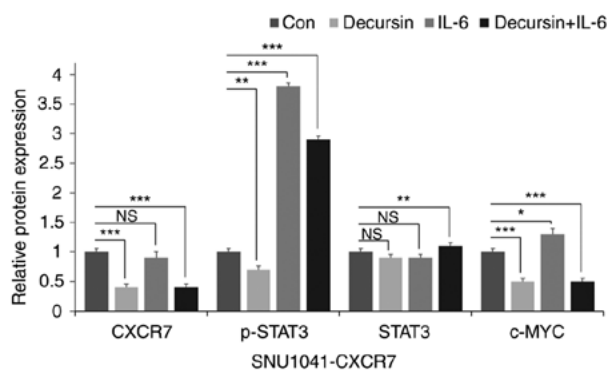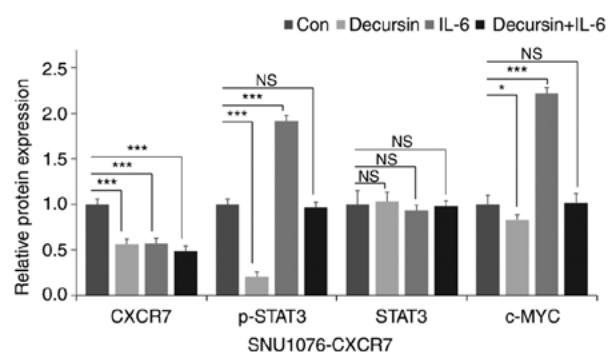

I Supplementary Figure 4A

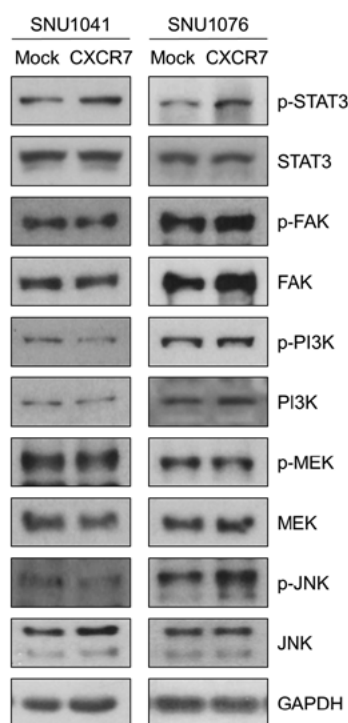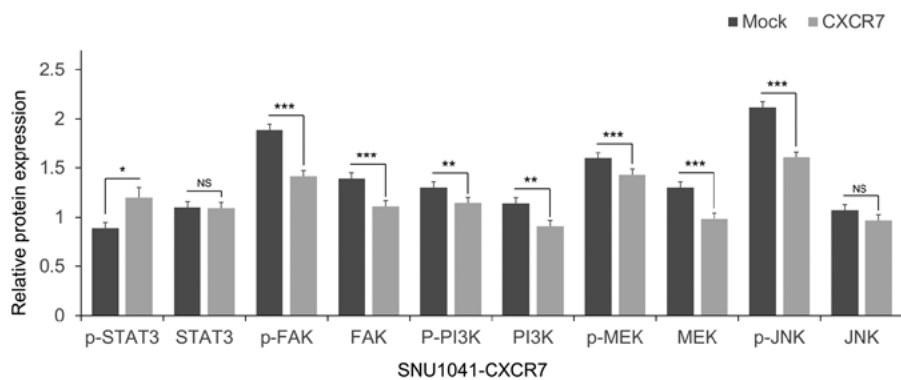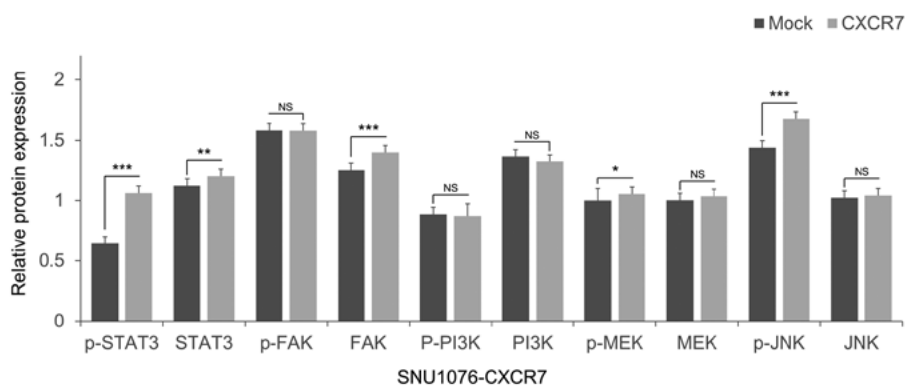

Table SI. Primer sequences for RT-PCR.

| Gene  | Forward (5'-3')      | Reverse (3'-5')      |
|-------|----------------------|----------------------|
| CXCR7 | ACGTGGTGGTCTTCCTTGTC | AAGGCCTTCATCAGCTCGTA |
| GAPDH | TTGATTTTGGAGGGATCTCG | GAGTCAACGGATTTGGTCGT |



Table SII. List of antibodies used in the supplementary information.

|   | Antibody | Dilution | Catalogue no. | Supplier                        |
|---|----------|----------|---------------|---------------------------------|
| 1 | p-FAK    | 1:1,000  | 3283          | Cell Signaling Technology, Inc. |
| 2 | FAK      | 1:1,000  | 3285          | Cell Signaling Technology, Inc. |
| 3 | p-PI3K   | 1:1,000  | 4228          | Cell Signaling Technology, Inc. |
| 4 | PI3K     | 1:1,000  | 4257          | Cell Signaling Technology, Inc. |
| 5 | p-MEK    | 1:1,000  | 9121          | Cell Signaling Technology, Inc. |
| 6 | MEK      | 1:1,000  | 9122          | Cell Signaling Technology, Inc. |
| 7 | p-JNK    | 1:1,000  | 4668          | Cell Signaling Technology, Inc. |
| 8 | JNK      | 1:1,000  | 9252          | Cell Signaling Technology, Inc. |
